# Supplementary material for: Infrared spectroscopic and theoretical investigations of novel iridium oxyfluorides
Source: Royal Society of Chemistry journal article supplement (doi:10.1039/d3cc02216a), 2023-01-01
Supplement: d3cc02216a1.pdf [file d3cc02216a1.pdf]

# Supporting Information

## **Infrared Spectroscopic and Theoretical Investigations of the novel Iridium Oxyfluorides**

Yan Lu,<sup>[a]</sup> Robert Medel,<sup>[a]</sup> Guohai Deng,<sup>[a]</sup> Sebastian Riedel\*<sup>[a]</sup>

[a] Y. Lu, Dr. R. Medel, Dr. G. H. Deng, Prof. Dr. S. Riedel  
Freie Universität Berlin  
Institut für Chemie und Biochemie–Anorganische Chemie  
Fabeckstrasse 34/36, 14195 Berlin (Germany)  
E-mail: s.riedel@fu-berlin.de

## Contents

|                                                                                                                                                              |     |
|--------------------------------------------------------------------------------------------------------------------------------------------------------------|-----|
| Experimental and computational details.....                                                                                                                  | S3  |
| <b>Figure S1.</b> IR spectra of reaction products of laser-ablated Ir atoms with either $^{16}\text{OF}_2$ or $^{18}\text{OF}_2$ in argon matrix.....        | S4  |
| <b>Figure S2.</b> Optimized structures of OIrF, OPtF and OAuF at B3LYP/aug-cc-pVTZ-PP level.....                                                             | S5  |
| <b>Figure S3.</b> Molecular orbitals of OIrF computed at B3LYP/aug-cc-pVTZ-PP level.....                                                                     | S5  |
| <b>Figure S4.</b> Optimized structures of OIrF <sub>2</sub> , OPtF <sub>2</sub> and OAuF <sub>2</sub> at B3LYP/aug-cc-pVTZ-PP level.....                     | S6  |
| <b>Figure S5.</b> Selected molecular orbitals of OIrF <sub>2</sub> at B3LYP/aug-cc-pVTZ-PP level.....                                                        | S6  |
| <b>Table S1.</b> Computed structures and electronic states of OIrF <sub>2</sub> .....                                                                        | S7  |
| <b>Table S2.</b> Calculated vibrational frequencies of OIrF <sub>2</sub> .....                                                                               | S7  |
| <b>Table S3.</b> Computed structures and electronic states of FOIrF.....                                                                                     | S8  |
| <b>Table S4.</b> Calculated vibrational frequencies of FOIrF.....                                                                                            | S8  |
| <b>Table S5.</b> Computed structures and electronic states of OIrF.....                                                                                      | S9  |
| <b>Table S6.</b> Calculated vibrational frequencies of OIrF.....                                                                                             | S9  |
| <b>Table S7.</b> Comparison of observed vibrational frequencies (in $\text{cm}^{-1}$ ) for OIrF, OPtF and OAuF.....                                          | S10 |
| <b>Table S8.</b> Comparison of observed vibrational frequencies (in $\text{cm}^{-1}$ ) for OIrF <sub>2</sub> , OPtF <sub>2</sub> and OAuF <sub>2</sub> ..... | S10 |
| <b>Table S9.</b> Computed thermochemistry stability of iridium oxyfluorides.....                                                                             | S11 |
| Calculated atomic coordinates of species at scalar relativistic levels (with PP).....                                                                        | S12 |
| References.....                                                                                                                                              | S15 |

## Experimental and computational details

The technique of matrix-isolation infrared (IR) spectroscopy and laser-ablation apparatus have been described in previous studies.<sup>1,2,3</sup> Matrix samples were prepared by co-deposition of laser-ablated iridium atoms with 0.02 % and 0.5 % OF<sub>2</sub> diluted in neon (99.999 %, Air Liquide) and argon (99.999 %, Sauerstoffwerk Friedrichshafen), respectively. The OF<sub>2</sub> was premixed with neon or argon in a custom-made stainless-steel mixing chamber.

The mixing chamber was connected to a self-made matrix chamber by a stainless-steel capillary. The gas mixture was condensed with laser-ablated iridium atoms onto a gold-plated mirror cooled to 5 K for neon and 12 K for argon using a closed-cycle helium cryostat (Sumitomo Heavy Industries, RDK-205D) inside the matrix chamber. For the laser-ablation, the 1064 nm fundamental of a Nd:YAG laser (Continuum, Minilite II, 10 Hz repetition rate, 55–60 mJ pulse<sup>-1</sup>) was focused onto a rotating iridium metal target (∅ 10 mm) using a plano-convex lens (∅ 25.4 mm, focal length of 125.0 mm) through a hole in the cold mirror.

Preparation of <sup>16/18</sup>OF<sub>2</sub> followed procedures described in the literature.<sup>4</sup> <sup>16/18</sup>OF<sub>2</sub> was synthesized by the reaction of elemental fluorine and <sup>16/18</sup>OH<sub>2</sub> dispersed in solid NaF.<sup>4</sup> Infrared spectra of the reaction products were recorded on a Bruker Vertex 80v spectrometer with a resolution of 0.5 cm<sup>-1</sup> in the region 4000–450 cm<sup>-1</sup> using a liquid-nitrogen-cooled mercury cadmium telluride (MCT) detector. Matrix samples were annealed at different temperatures, and the samples were subjected to photolysis using a mercury arc streetlamp (Osram HQL 250) with the outer globe removed ( $\lambda > 220$  nm).

Density functional theory (DFT) calculations were performed using the Gaussian16 program package<sup>5</sup> employing the hybrid functional B3LYP<sup>6</sup> with the augmented triple- $\zeta$  basis sets aug-cc-pVTZ<sup>7</sup> for fluorine and oxygen and the aug-cc-pVTZ-PP<sup>8</sup> valence basis and associated scalar-relativistic pseudopotential (PP) for iridium. Subsequent structure optimizations as well as harmonic vibrational frequency analyses at the CCSD(T)<sup>9</sup>(coupled-cluster singles-doubles with perturbational triples) level with aug-cc-pVTZ-PP basis sets were carried out in the spin unrestricted ROHF-UCCSD(T) open-shell coupled cluster formalism using default frozen core settings as implemented in the Molpro 2019 software package.<sup>10</sup>

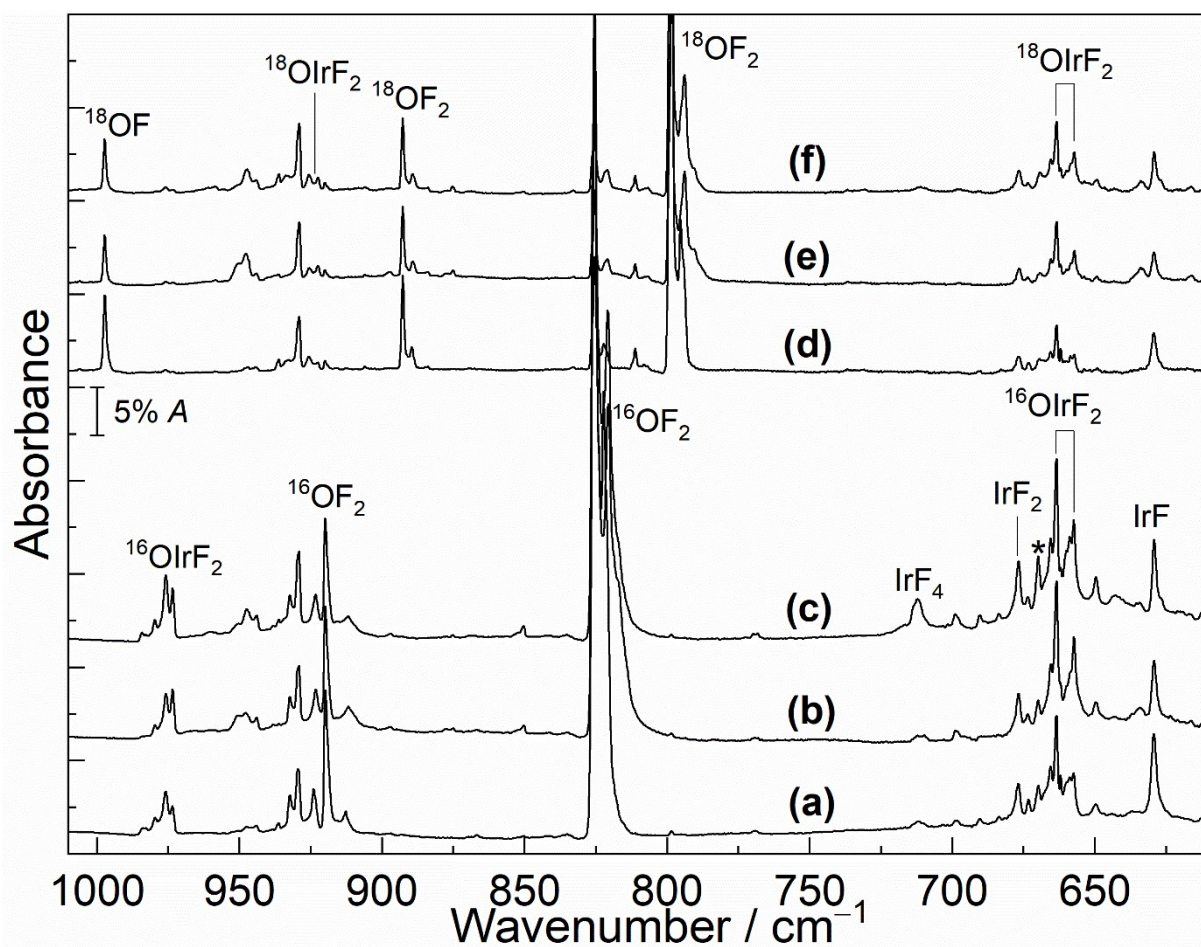

**Figure S1.** IR spectra in argon matrix at 12 K. (a) IR spectrum of reaction products of laser-ablated Ir atoms with 0.5% <sup>16</sup>O<sub>2</sub>; (b) after annealing to 25 K; (c) after full-arc (> 220 nm) for 20 min. (d) IR spectrum of reaction products of laser-ablated Ir atoms with 0.5% <sup>18</sup>O<sub>2</sub>; (e) after annealing to 25 K; (f) after full-arc (> 220 nm) for 20 min. The bands marked with asterisks are assigned to unknown impurities.

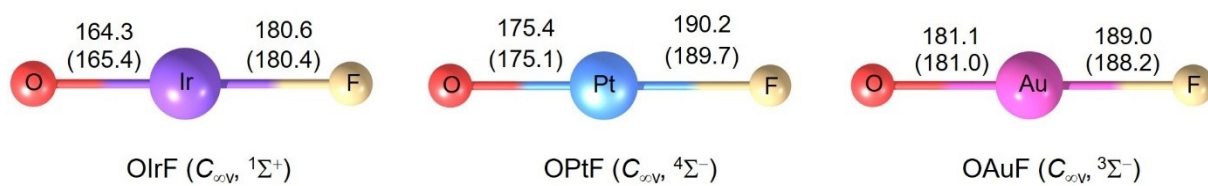

**Figure S2.** Optimized structures of OIrF, OPtF and OAuF in their ground states at B3LYP/aug-cc-pVTZ-PP level. Bond lengths in pm are shown. The CCSD(T) values are given in parentheses.

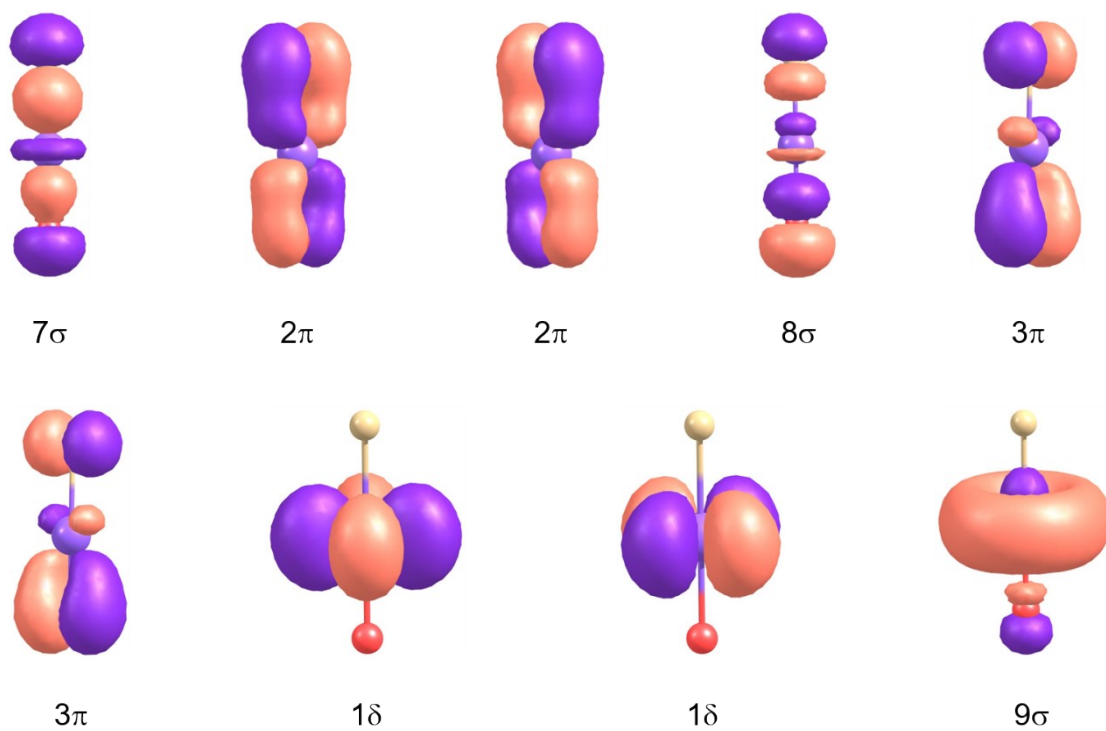

**Figure S3.** Molecular orbitals of OIrF computed at B3LYP/aug-cc-pVTZ-PP level.

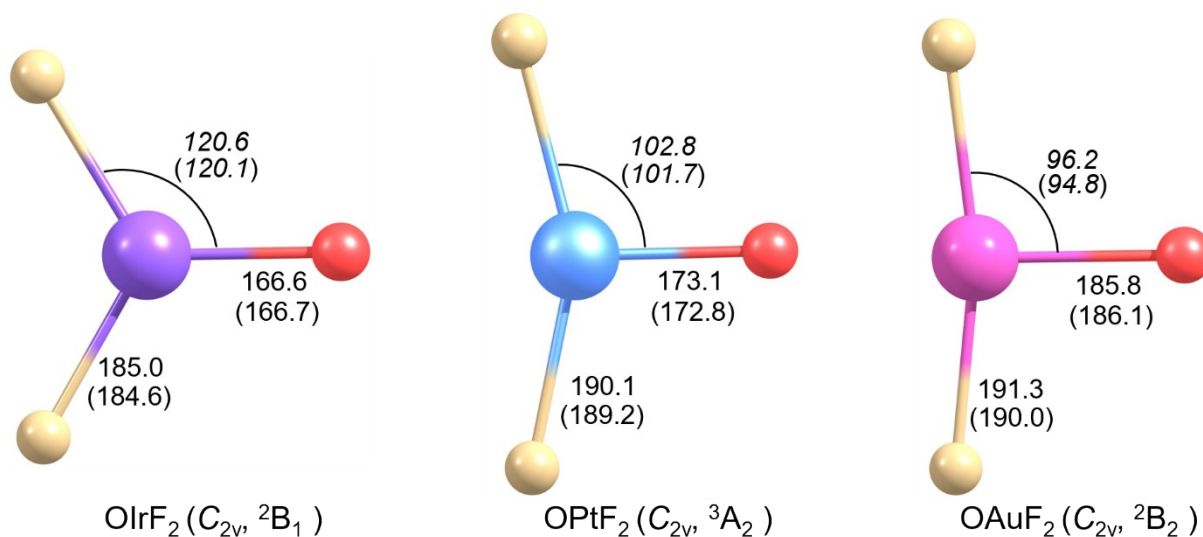

**Figure S4.** Optimized structures of  $\text{OIrF}_2$ ,  $\text{OPtF}_2$  and  $\text{OAuF}_2$  in their ground states at B3LYP/aug-cc-pVTZ-PP level. Selected bond lengths in pm and angles in deg (in italics) are shown. The CCSD(T) values are given in parentheses.

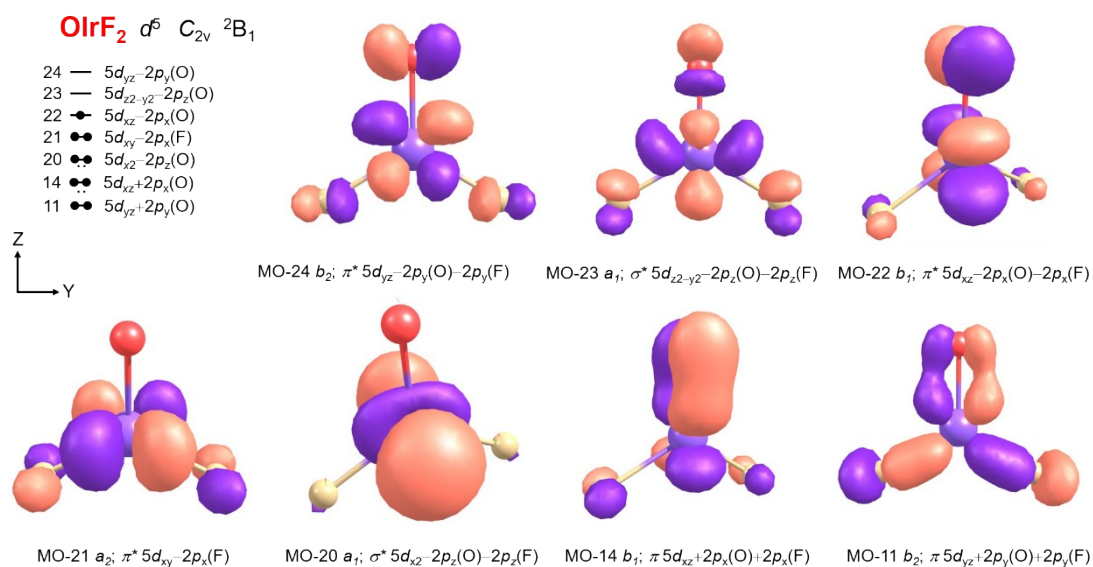

**Figure S5.** Selected molecular orbitals of  $\text{OIrF}_2$  ( ${}^2B_1$ ,  $C_{2v}$ ). (B3LYP/AVTZ(-PP), Kohn-Sham orbitals with  $\alpha$  spin; iso-surface = 0.09 electron a.u.<sup>-3</sup>)

**Table S1.** Electronic states and electronic energy differences (kJ mol<sup>-1</sup>) of OIrF<sub>2</sub> at scalar-relativistic pseudopotential levels.

| Electronic state<br>(Sym.)                     | CCSD(T) <sup>a</sup><br>$\Delta E + \Delta ZPE$ | B3LYP <sup>a</sup><br>$\Delta E + \Delta ZPE$ |
|------------------------------------------------|-------------------------------------------------|-----------------------------------------------|
| <sup>2</sup> B <sub>1</sub> (C <sub>2v</sub> ) | 0                                               | 0                                             |
| <sup>4</sup> B <sub>2</sub> (C <sub>2v</sub> ) | 97.4                                            | 81.9                                          |

<sup>a</sup>aug-cc-pVTZ-PP basis sets.

**Table S2.** Comparison of observed and computed vibrational frequencies (cm<sup>-1</sup>) for OIrF<sub>2</sub>.

|                                 | Ground state<br>(Sym.)                         | Exp.<br>Ne matrix | Ar matrix   | Calc. (Int) <sup>a</sup><br>B3LYP | CCSD(T) | Modes                            |
|---------------------------------|------------------------------------------------|-------------------|-------------|-----------------------------------|---------|----------------------------------|
| <sup>16</sup> OIrF <sub>2</sub> | <sup>2</sup> B <sub>1</sub> (C <sub>2v</sub> ) | 984.1/980.7       | 976.0/973.6 | 1042.6 (64)                       | 1033.1  | $\nu(\text{Ir-}^{16}\text{O})$   |
|                                 |                                                | 672.6             | 663.6       | 671.7 (115)                       | 684.1   | $\nu_{\text{as}}(\text{Ir-F}_2)$ |
|                                 |                                                | 666.8             | 657.5       | 670.5 (57)                        | 682.8   | $\nu_{\text{s}}(\text{Ir-F}_2)$  |
| <sup>18</sup> OIrF <sub>2</sub> | <sup>2</sup> B <sub>1</sub> (C <sub>2v</sub> ) | 933.7/929.6       | 925.8/922.6 | 987.37 (58)                       | 978.6   | $\nu(\text{Ir-}^{18}\text{O})$   |
|                                 |                                                | 672.6             | 663.6       | 671.7 (115)                       | 684.1   | $\nu_{\text{as}}(\text{Ir-F}_2)$ |
|                                 |                                                | 666.8             | 657.5       | 670.5 (57)                        | 682.8   | $\nu_{\text{s}}(\text{Ir-F}_2)$  |

<sup>a</sup>aug-cc-pVTZ-PP basis sets. Intensities are shown in parentheses in km mol<sup>-1</sup>. For the CCSD(T) calculations no intensities are available.

**Table S3.** Electronic states and electronic energy differences (kJ mol<sup>-1</sup>) of FOIrF at scalar-relativistic pseudopotential levels.

| Electronic state (Sym.)           | CCSD(T) <sup>a</sup>    | B3LYP <sup>a</sup>      |
|-----------------------------------|-------------------------|-------------------------|
|                                   | $\Delta E + \Delta ZPE$ | $\Delta E + \Delta ZPE$ |
| <sup>2</sup> A" (C <sub>s</sub> ) | 16.5                    | –                       |
| <sup>4</sup> A' (C <sub>s</sub> ) | 1.2                     | 4.9                     |
| <sup>4</sup> A" (C <sub>s</sub> ) | 0                       | 0                       |

<sup>a</sup>aug-cc-pVTZ-PP basis sets.

**Table S4.** Comparison of observed and computed vibrational frequencies (cm<sup>-1</sup>) for FOIrF.

|                      | Electronic state (Sym.)           | Calc. (Int) <sup>a</sup> | CCSD(T) | Exp. Ne matrix |
|----------------------|-----------------------------------|--------------------------|---------|----------------|
|                      |                                   | B3LYP                    |         |                |
| F <sup>16</sup> OIrF | <sup>2</sup> A" (C <sub>s</sub> ) | –                        | 938.5   | 889.3          |
|                      |                                   | –                        | 698.1   | 685.1          |
|                      |                                   | –                        | 464.4   | –              |
| F <sup>18</sup> OIrF | <sup>2</sup> A" (C <sub>s</sub> ) | –                        | 890.6   | 842.9          |
|                      |                                   | –                        | 697.9   | 684.1          |
|                      |                                   | –                        | 446.1   | –              |
| F <sup>16</sup> OIrF | <sup>4</sup> A' (C <sub>s</sub> ) | 735.8 (65)               | 713.6   |                |
|                      |                                   | 621.4 (150)              | 625.9   |                |
|                      |                                   | 489.6 (57)               | 524.2   |                |
| F <sup>16</sup> OIrF | <sup>4</sup> A" (C <sub>s</sub> ) | 704.5 (63)               | 741.7   |                |
|                      |                                   | 619.8 (162)              | 639.8   |                |
|                      |                                   | 494.2 (98)               | 741.7   |                |

<sup>a</sup>aug-cc-pVTZ-PP basis sets. Intensities are shown in parentheses in km mol<sup>-1</sup>. For the CCSD(T) calculations no intensities are available.



**Table S5.** Electronic states, structural parameters (pm, deg), electronic energy differences (kJ mol<sup>-1</sup>) of selected states of OIrF at scalar-relativistic pseudopotential levels.

| Electronic state (Sym.)    | CCSD(T) <sup>a</sup>           |                     |                         | B3LYP <sup>a</sup>             |                     |                         |
|----------------------------|--------------------------------|---------------------|-------------------------|--------------------------------|---------------------|-------------------------|
|                            | Bond lengths [pm]<br>O–Ir/Ir–F | Angle [°]<br>O–Ir–F | $\Delta E + \Delta ZPE$ | Bond lengths [pm]<br>O–Ir/Ir–F | Angle [°]<br>O–Ir–F | $\Delta E + \Delta ZPE$ |
| $1\Sigma^+ (C_{\infty v})$ | 165.4/180.4                    | 180.0               | 0                       | 164.3/180.6                    | 180.0               | 0                       |
| $3\Sigma^- (C_{\infty v})$ | 173.9/193.9                    | 180.0               | 190.3                   | –                              | –                   | –                       |
| $3\Pi (C_{\infty v})$      | 169.8/186.6                    | 180.0               | 72.6                    | 169.0/186.9                    | 180.0               | 54.7                    |
| $5\Delta (C_{\infty v})$   | 175.8/192.9                    | 180.0               | 134.4                   | 176.3/193.3                    | 180.0               | 111.9                   |

<sup>a</sup>aug-cc-pVTZ-PP basis sets.

**Table S6.** Comparison of observed and computed vibrational frequencies (cm<sup>-1</sup>) for OIrF.

|                    | Ground state (Sym.)        | Exp. Ne matrix | Calc. (Int) <sup>a</sup> |         | Modes                          |
|--------------------|----------------------------|----------------|--------------------------|---------|--------------------------------|
|                    |                            |                | B3LYP                    | CCSD(T) |                                |
| <sup>16</sup> OIrF | $1\Sigma^+ (C_{\infty v})$ | –              | 1106.0 (76)              | 1053.4  | $\nu(\text{Ir}-^{16}\text{O})$ |
|                    |                            | 732.2          | 735.4 (95)               | 741.7   | $\nu(\text{Ir}-\text{F})$      |
| <sup>18</sup> OIrF | $1\Sigma^+ (C_{\infty v})$ | –              | 1047.5 (71)              | 998.0   | $\nu(\text{Ir}-^{18}\text{O})$ |
|                    |                            | 732.2          | 735.1 (94)               | 741.4   | $\nu(\text{Ir}-\text{F})$      |

<sup>a</sup>aug-cc-pVTZ-PP basis sets. Intensities are shown in parentheses in km mol<sup>-1</sup>. For the CCSD(T) calculations no intensities are available.

**Table S7.** Comparison of observed vibrational frequencies (in  $\text{cm}^{-1}$ ) for OIrF, OPtF and OAuF.

| Species                                         | CCSD(T) <sup>a</sup><br>Calc. | Exp.<br>Ne matrix | Modes              |
|-------------------------------------------------|-------------------------------|-------------------|--------------------|
| OIrF ( $C_{\infty v}, 1\Sigma^+$ )              | 1053.4                        | –                 | $\nu(\text{Ir-O})$ |
|                                                 | 741.7                         | 732.2             | $\nu(\text{Ir-F})$ |
| OPtF ( $C_{\infty v}, 4\Sigma^-$ ) <sup>1</sup> | 848.3                         | –                 | $\nu(\text{Pt-O})$ |
|                                                 | 640.3                         | 611.8             | $\nu(\text{Pt-F})$ |
| OAuF ( $C_{\infty v}, 3\Sigma^-$ ) <sup>2</sup> | 767.9                         | –                 | $\nu(\text{Au-O})$ |
|                                                 | 642.6                         | 629.4             | $\nu(\text{Au-F})$ |

<sup>a</sup>aug-cc-pVTZ-PP basis sets.**Table S8.** Comparison of observed vibrational frequencies (in  $\text{cm}^{-1}$ ) for OIrF<sub>2</sub>, OPtF<sub>2</sub> and OAuF<sub>2</sub>.

| Species                                           | CCSD(T) <sup>a</sup><br>Calc. | Exp.<br>Ne matrix | Ar matrix | Modes                     |
|---------------------------------------------------|-------------------------------|-------------------|-----------|---------------------------|
| OIrF <sub>2</sub> ( $C_{2v}, 2B_1$ )              | 682.2                         | 666.8             | 657.5     | $\nu_s(\text{Ir-F}_2)$    |
|                                                   | 684.1                         | 672.6             | 663.6     | $\nu_{as}(\text{Ir-F}_2)$ |
|                                                   | 1033.1                        | 980.7             | 973.6     | $\nu(\text{Ir-O})$        |
| OPtF <sub>2</sub> ( $C_{2v}, 3A_2$ ) <sup>1</sup> | 627.0                         | –                 | –         | $\nu_s(\text{Pt-F}_2)$    |
|                                                   | 652.2                         | 650.2             | 635.2     | $\nu_{as}(\text{Pt-F}_2)$ |
|                                                   | 870.8                         | –                 | –         | $\nu(\text{Pt-O})$        |
| OAuF <sub>2</sub> ( $C_{2v}, 2B_2$ ) <sup>2</sup> | 616.0                         | –                 | –         | $\nu(\text{Au-O})$        |
|                                                   | 621.4                         | –                 | –         | $\nu_s(\text{Au-F}_2)$    |
|                                                   | 659.2                         | 655.3             | 634.6     | $\nu_{as}(\text{Au-F}_2)$ |

<sup>a</sup>aug-cc-pVTZ-PP basis sets. For the CCSD(T) calculations no intensities are available.

**Table S9.** Computed thermochemical stability of iridium oxyfluorides (298.15 K, kJ mol<sup>-1</sup>) at B3LYP and CCSD(T) level.

| Reaction                                 | B3LYP <sup>a</sup>      |              | CCSD(T) <sup>a</sup>    |                |
|------------------------------------------|-------------------------|--------------|-------------------------|----------------|
|                                          | $\Delta E + \Delta ZPE$ | $\Delta_r H$ | $\Delta E + \Delta ZPE$ | $\Delta_r H^b$ |
| Ir + OF → OIrF                           | -744.6                  | -746.8       | -778.3                  | -780.8         |
| OIrF + F → OIrF <sub>2</sub>             | -332.6                  | -336.3       | -307.7                  | -311.7         |
| Ir + OF <sub>2</sub> → OIrF <sub>2</sub> | -924.5                  | -926.3       | -929.7                  | -932.4         |
| FOIrF → OIrF <sub>2</sub>                | -                       | -            | -389.0                  | -              |
| Ir + OF <sub>2</sub> → FOIrF             | -                       | -            | -540.7                  | -              |

<sup>a</sup>aug-cc-pVTZ-PP basis sets. <sup>b</sup>The enthalpies at CCSD(T) level were calculated by adding the enthalpy corrections (B3LYP) to electronic energy changes.

Calculated atomic coordinates (in Å) of species for optimized structures at B3LYP/aug-cc-pVTZ-PP level.

**OIrF  $^1\Sigma^+$  ( $C_{\infty v}$ ):**

|    |            |            |             |
|----|------------|------------|-------------|
| Ir | 0.00000000 | 0.00000000 | 0.03303700  |
| O  | 0.00000000 | 0.00000000 | 1.67632500  |
| F  | 0.00000000 | 0.00000000 | -1.77271300 |

**OIrF  $^3\Pi$  ( $C_{\infty v}$ ):**

|    |            |            |             |
|----|------------|------------|-------------|
| Ir | 0.00000000 | 0.00000000 | 0.03518100  |
| O  | 0.00000000 | 0.00000000 | 1.72473200  |
| F  | 0.00000000 | 0.00000000 | -1.83408400 |

**OIrF  $^5\Delta$  ( $C_{\infty v}$ ):**

|    |            |            |             |
|----|------------|------------|-------------|
| Ir | 0.00000000 | 0.00000000 | 0.03503900  |
| O  | 0.00000000 | 0.00000000 | 1.79780500  |
| F  | 0.00000000 | 0.00000000 | -1.89782500 |

**OIrF<sub>2</sub>  $^2B_1$  ( $C_{2v}$ ):**

|    |            |             |             |
|----|------------|-------------|-------------|
| Ir | 0.00000000 | 0.00000000  | 0.03532600  |
| O  | 0.00000000 | 0.00000000  | 1.70111100  |
| F  | 0.00000000 | 1.59208700  | -0.90716600 |
| F  | 0.00000000 | -1.59208700 | -0.90716600 |

**OIrF<sub>2</sub>  $^4B_2$  ( $C_{2v}$ ):**

|    |            |             |             |
|----|------------|-------------|-------------|
| Ir | 0.00000000 | 0.00000000  | 0.09759100  |
| O  | 0.00000000 | 0.00000000  | 1.81420900  |
| F  | 0.00000000 | 1.33096300  | -1.22379000 |
| F  | 0.00000000 | -1.33096300 | -1.22379000 |

**FOIrF  $^4A''$  ( $C_s$ ):**

|    |             |             |            |
|----|-------------|-------------|------------|
| Ir | 0.00000000  | 0.20313300  | 0.00000000 |
| O  | 0.81361000  | -1.44114500 | 0.00000000 |
| F  | -0.27832700 | -2.49285500 | 0.00000000 |
| F  | -0.44488200 | 2.03596000  | 0.00000000 |

**FOIrF  $^4A'$  ( $C_s$ ):**

|    |             |             |            |
|----|-------------|-------------|------------|
| Ir | 0.00000000  | 0.19608700  | 0.00000000 |
| O  | 0.82568600  | -1.46042700 | 0.00000000 |
| F  | -0.34059900 | -2.42340800 | 0.00000000 |
| F  | -0.39334400 | 2.04393600  | 0.00000000 |

**Calculated atomic coordinates (in Å) of species for optimized structures at CCSD(T)/aug-cc-pVTZ-PP level.**

**OIrF  $^1\Sigma^+$  ( $C_{\infty v}$ ):**

|    |              |              |               |
|----|--------------|--------------|---------------|
| Ir | 0.0000000000 | 0.0000000000 | 0.0288126011  |
| O  | 0.0000000000 | 0.0000000000 | 1.6830588551  |
| F  | 0.0000000000 | 0.0000000000 | -1.7752224562 |

**OIrF  $^3\Sigma^-$  ( $C_{\infty v}$ ):**

|    |              |              |               |
|----|--------------|--------------|---------------|
| Ir | 0.0000000000 | 0.0000000000 | 0.0454514358  |
| O  | 0.0000000000 | 0.0000000000 | 1.7844925815  |
| F  | 0.0000000000 | 0.0000000000 | -1.8932950173 |

**OIrF  $^3\Pi$  ( $C_{\infty v}$ ):**

|    |              |              |               |
|----|--------------|--------------|---------------|
| Ir | 0.0000000000 | 0.0000000000 | 0.0348429644  |
| O  | 0.0000000000 | 0.0000000000 | 1.7328641011  |
| F  | 0.0000000000 | 0.0000000000 | -1.8310580654 |

**OIrF  $^5\Delta$  ( $C_{\infty v}$ ):**

|    |              |              |              |
|----|--------------|--------------|--------------|
| Ir | 0.0000000000 | 0.0000000000 | 0.035492183  |
| O  | 0.0000000000 | 0.0000000000 | 1.793250147  |
| F  | 0.0000000000 | 0.0000000000 | -1.893723380 |

**OIrF<sub>2</sub>  $^2B_1$  ( $C_{2v}$ ):**

|    |              |               |               |
|----|--------------|---------------|---------------|
| Ir | 0.0000000000 | 0.0000000000  | 0.0274677603  |
| O  | 0.0000000000 | 0.0000000000  | 1.6944354444  |
| F  | 0.0000000000 | 1.5967376484  | -0.8998991024 |
| F  | 0.0000000000 | -1.5967376484 | -0.8998991024 |

**OIrF<sub>2</sub>  $^4B_2$  ( $C_{2v}$ ):**

|    |              |              |             |
|----|--------------|--------------|-------------|
| Ir | 0.0000000000 | 0.0000000000 | 0.093466085 |
| O  | 0.0000000000 | 0.0000000000 | 1.809982368 |

|   |             |              |              |
|---|-------------|--------------|--------------|
| F | 0.000000000 | 1.330190455  | -1.219614246 |
| F | 0.000000000 | -1.330190455 | -1.219614246 |

**FOIrF <sup>2</sup>A" (C<sub>s</sub>):**

|    |               |               |              |
|----|---------------|---------------|--------------|
| Ir | -0.2413869467 | -0.1209942502 | 0.0000000000 |
| O  | 1.3923426250  | -0.6448803225 | 0.0000000000 |
| F  | 2.5960277687  | 0.6042594348  | 0.0000000000 |
| F  | -2.0510181670 | 0.2495297479  | 0.0000000000 |

**FOIrF <sup>4</sup>A' (C<sub>s</sub>):**

|    |               |               |              |
|----|---------------|---------------|--------------|
| Ir | 0.0331075569  | 0.1872999277  | 0.0000000000 |
| O  | 0.8600944827  | -1.4832103073 | 0.0000000000 |
| F  | -0.3750426727 | -2.3611201206 | 0.0000000000 |
| F  | -0.4264163669 | 2.0132185002  | 0.0000000000 |

**FOIrF <sup>4</sup>A" (C<sub>s</sub>):**

|    |              |              |             |
|----|--------------|--------------|-------------|
| Ir | 0.033226368  | 0.186144793  | 0.000000000 |
| O  | 0.858337570  | -1.452030730 | 0.000000000 |
| F  | -0.323797835 | -2.430704887 | 0.000000000 |
| F  | -0.477365103 | 2.001683823  | 0.000000000 |

## References

- 1 L. Li, H. Beckers, T. Stüker, T. Lindič, T. Schlöder, D. Andrae and S. Riedel, *Inorg. Chem. Front.*, 2021, **8**, 1215.
- 2 L. Li, T. Stüker, S. Kieninger, D. Andrae, T. Schlöder, Y. Gong, L. Andrews, H. Beckers and S. Riedel, *Nat. Commun.*, 2018, **9**, 1267.
- 3 (a) R. Wei, Z. T. Fang, M. Vasiliu, D. A. Dixon, L. Andrews and Y. Gong, *Inorg. Chem.*, 2019, **58**, 9796; b) L. Andrews, X. Wang, Y. Gong, T. Schlöder, S. Riedel and M. J. Franger, *Angew. Chem. Int. Ed.*, 2012, **51**, 8235.
- 4 A. H. Borning and K. E. Pullen, *Inorg. Chem.*, 1969, **8**, 1791.
- 5 M. J. Frisch, G. W. Trucks, H. B. Schlegel, G. E. Scuseria, M. A. Robb, J. R. Cheeseman, G. Scalmani, V. Barone, G. A. Petersson, H. Nakatsuji, X. Li, M. Caricato, A. V. Marenich, J. Bloino, B. G. Janesko, R. Gomperts, B. Mennucci, H. P. Hratchian, J. V. Ortiz, A. F. Izmaylov, J. L. Sonnenberg, D. Williams-Young, F. Ding, F. Lipparini, F. Egidi, J. Goings, B. Peng, A. Petrone, T. Henderson, D. Ranasinghe, V. G. Zakrzewski, J. Gao, N. Rega, G. Zheng, W. Liang, M. Hada, M. Ehara, K. Toyota, R. Fukuda, J. Hasegawa, M. Ishida, T. Nakajima, Y. Honda, O. Kitao, H. Nakai, T. Vreven, K. Throssell, J. A. Montgomery, Jr., J. E. Peralta, F. Ogliaro, M. J. Bearpark, J. J. Heyd, E. N. Brothers, K. N. Kudin, V. N. Staroverov, T. A. Keith, R. Kobayashi, J. Normand, K. Raghavachari, A. P. Rendell, J. C. Burant, S. S. Iyengar, J. Tomasi, M. Cossi, J. M. Millam, M. Klene, C. Adamo, R. Cammi, J. W. Ochterski, R. L. Martin, K. Morokuma, O. Farkas, J. B. Foresman, and D. J. Fox, *Gaussian 16*, Gaussian, Inc., Wallingford CT, 2016.
- 6 (a) P. J. Stephens, F. J. Devlin, C. F. Chabalowski and M. J. Frisch, *J. Phys. Chem.*, 1994, **98**, 11623; (b) A. D. Becke, *J. Chem. Phys.*, 1993, **98**, 5648; (c) C. Lee, W. Yang and R. G. Parr, *Phys. Rev. B*, 1988, **37**, 785; (d) S. H. Vosko, L. Wilk and M. Nusair, *Can. J. Phys.*, 1980, **58**, 1200.
- 7 R. A. Kendall, T. H. Dunning and R. J. Harrison, *J. Chem. Phys.*, 1992, **96**, 6796.
- 8 (a) D. Figgen, K. A. Peterson, M. Dolg and H. Stoll, *J. Chem. Phys.*, 2009, **130**, 164108; (b) K. A. Peterson, D. Figgen, M. Dolg and H. Stoll, *J. Chem. Phys.*, 2007, **126**, 124101.
- 9 (a) K. Raghavachari, G. W. Trucks, J. A. Pople and M. Head-Gordon, *Chem. Phys. Lett.*, 1989, **157**, 479; (b) G. D. Purvis and R. J. Bartlett, *J. Chem. Phys.*, 1982, **76**, 1910.
- 10 H. -J. Werner, P. J. Knowles, G. Knizia, F. R. Manby, M. Schütz, P. Celani, W. Györffy, D. Kats, T. Korona, R. Lindh, A. Mitrushenkov, G. Rauhut, K. R. Shamasundar, T. B. Adler, R. D. Amos, S. J. Bennie, A. Bernhardsson, A. Berning, D. L. Cooper, M. J. O. Deegan, A. J. Dobbyn, F. Eckert, E. Goll, C. Hampel, A. Hesselmann, G. Hetzer, T. Hrenar, G. Jansen, C. Köppl, S. J. R. Lee, Y. Liu, A. W. Lloyd, Q. Ma, R. A. Mata, A. J. May, S. J. McNicholas, W. Meyer, T. F. Miller III, M. E. Mura, A. Nicklass, D. P. O'Neill, P. Palmieri, D. Peng, K. Pflüger, R. Pitzer, M. Reiher, T. Shiozaki, H. Stoll, A. J. Stone, R. Tarroni, T. Thorsteinsson, M. Wang, M. Welborn, *MOLPRO, version 2019.2, a package of ab initio programs*.
